# Supplementary material for: Adolescents and adults with FOXP1 syndrome show high rates of anxiety and externalizing behaviors but not psychiatric decompensation or skill loss
Source: Frontiers journal article supplement (doi:10.3389/fpsyt.2025.1526383), 2025-02-24
Supplement: Data_Sheet_1.pdf [file Data_Sheet_1.pdf]

# Visual Analog Scale (VAS)

Please complete the survey below.

Thank you!

## Please list the top three concerns you had about your child during his/her early childhood.

Childhood Concern #1

Please rate this concern as it presented during early childhood.

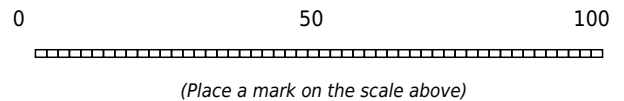

Please rate this same concern now, as an adolescent/adult.

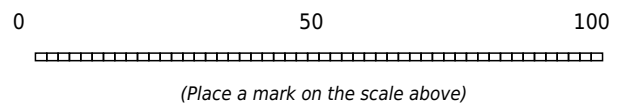

Childhood Concern #2

Please rate this concern as it presented during early childhood.

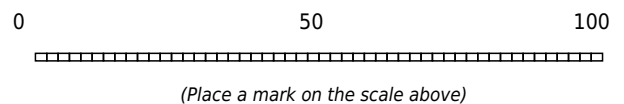

Please rate this same concern now, as an adolescent/adult.

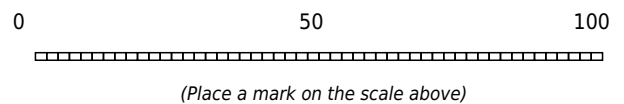

Childhood Concern #3

Please rate this concern as it presented during early childhood.

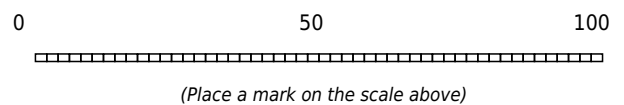

Please rate this same concern now, as an adolescent/adult.

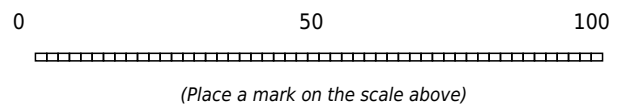

## Please list the top three concerns you have about your child now, as an adolescent/adult.

Adolescent/Adult Concern #1

Please rate this concern.

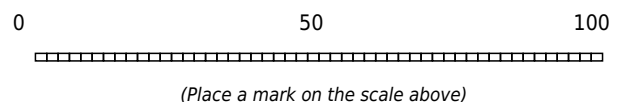

Adolescent/Adult Concern #2

---

Please rate this concern.

0

50

100

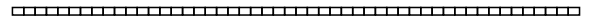

(Place a mark on the scale above)

---

Adolescent/Adult Concern #3

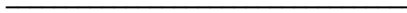

---

Please rate this concern.

0

50

100

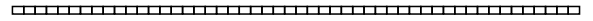

(Place a mark on the scale above)
